# Supplementary material for: Improving Conformational Stability and Bacterial Membrane Interactions of Antimicrobial Peptides with Amphipathic Helical Structure
Source: Research Square preprint supplement (doi:10.21203/rs.3.rs-7340189/v1), 2025-08-20
Supplement: Supplementary file 1 [file a7288c627cbaca5bf0101311.docx]

**Supplementary Materials**

Improving Conformational Stability and Bacterial Membrane Interactions of Antimicrobial Peptides with Amphipathic Helical Structure

Ahmad Habibie,1,2 Rizki Amalia Putri,1,2 Respati Tri Swasono,1 Endah Retnaningrum,3 Prajnaparamita Dhar,4 Krzysztof Kuczera,5,6 Tri Joko Raharjo,1* and Teruna J. Siahaan2*

1 Department of Chemistry, Faculty of Mathematics and Natural Sciences, Universitas Gadjah Mada, Sekip Utara, Yogyakarta 55281, Indonesia

2 Department of Pharmaceutical Chemistry, School of Pharmacy, The University of Kansas, Simons Laboratories, 2095 Constant Ave., Lawrence, Kansas, USA

3 Department of Biology, Faculty of Biology, Universitas Gadjah Mada, Sekip Utara, Yogyakarta 55281, Indonesia

4 Department of Chemical and Petroleum Engineering, School of Engineering, The University of Kansas, Eaton Hall, 1520 W 15th St, Lawrence, Kansas 66045, USA

5 Department of Chemistry, College of Liberal Arts & Sciences, The University of Kansas, Gray-Little Hall, 1567 Irving Hill Rd, Lawrence, KS 66045, USA

6 Department of Molecular Biosciences, College of Liberal Arts & Sciences, The University of Kansas, Haworth Hall, 1200 Sunnyside Avenue, Lawrence, KS 66045, USA

*Co-Corresponding Authors:

Dr. Tri Joko Raharjo, email: [trijr_mipa@ugm.ac.id](mailto:trijr_mipa@ugm.ac.id)

Dr. Teruna J. Siahaan, email: [siahaan@ku.edu](mailto:siahaan@ku.edu)


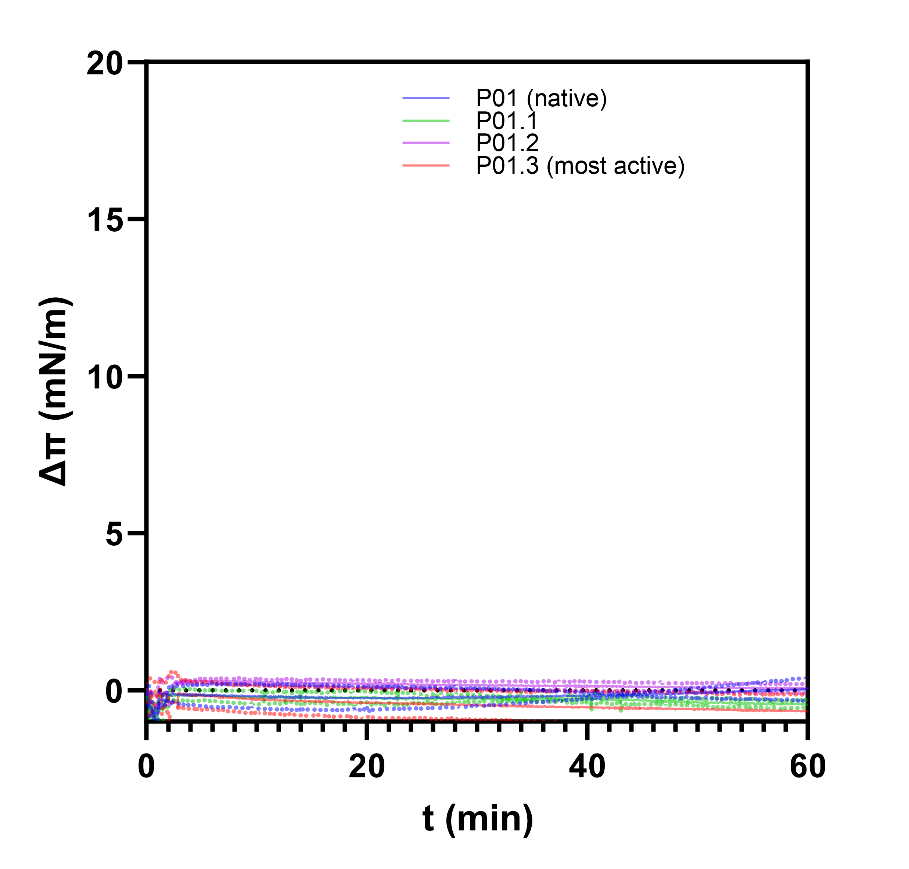


**Supplementary Figure S1.** Delta surface pressure (Δπ) of peptides, measured in water only.
